1 **Title:** Built Environment Features Obtained from Google Street View Are Associated with Coronary  
2 Artery Disease Prevalence: A Deep-Learning Framework

3  
4 **Authors:** Zhuo Chen, PhD; Yassin Khalifa, PhD; Jean-Eudes Dazard, PhD; Issam Motairek, MD; Sanjay  
5 Rajagopalan, MD\*; Sadeer Al-Kindi, MD\*

6  
7 \*Contributed Equally

8  
9 **Affiliations**

10 Harrington Heart and Vascular Institute, University Hospitals, and School of Medicine, Case Western  
11 Reserve University, Cleveland, OH

12  
13 **Corresponding Authors**

14 Sadeer Al-Kindi, MD, FACC  
15 Assistant Professor of Medicine  
16 University Hospitals Harrington Heart and Vascular Institute  
17 Case Western Reserve University School of Medicine  
18 11100 Euclid Ave, Cleveland, OH 44106  
19 Email: [sadeer.al-kindi@uhhospitals.org](mailto:sadeer.al-kindi@uhhospitals.org)

20  
21 OR

22  
23 Sanjay Rajagopalan, MD, FACC  
24 Herman K Hellerstein Professor of Cardiovascular Research  
25 Director, Cardiovascular Research Institute  
26 University Hospitals Harrington Heart and Vascular Institute  
27 Case Western Reserve University School of Medicine  
28 11100 Euclid Ave, Cleveland, OH 44106  
29 Email: [sanjay.rajagopalan@uhhospitals.org](mailto:sanjay.rajagopalan@uhhospitals.org)

30  
31 **Key words:** Cardiovascular risk, neighborhood, phenotypes, socio-environmental, machine learning

32  
33 **Word count:**

34  
35 **Disclosures:** None of the authors have conflicts of interest relevant to the contents of  
36 this manuscript.

37  
38 **Funding:** This work was funded by the National Institute on Minority Health and Health Disparities  
39 Award # P50MD017351 and 1R35ES031702-01 awarded to Dr. Rajagopalan.

40 **Abstract**

41 Background: Built environment plays an important role in development of cardiovascular disease. Tools  
42 to evaluate the built environment using machine vision and informatic approaches has been limited. We  
43 sought to investigate the association between machine vision-based built environment and prevalence of  
44 cardiometabolic disease in urban cities.

45 Methods: This cross-sectional study used features extracted from Google Street view (GSV) images to  
46 measure the built environment and link them with prevalence of cardiometabolic disease. Convolutional  
47 neural networks, light gradient boosting machines and activation maps were utilized to predict health  
48 outcomes and identify feature associations with coronary heart disease (CHD). The study obtained 0.53  
49 million GSV images covering 789 census tracts in 7 cities (Cleveland, OH; Fremont, CA; Kansas City, MO;  
50 Detroit, MI; Bellevue, WA; Brownsville, TX; and Denver, CO). Analyses were conducted from February  
51 2022 to December 2022. We used census tract-level data from the Centers for Disease Control and  
52 Prevention's PLACES dataset. Main outcomes included census tract-level estimated prevalence of CHD  
53 based on GSV built environment features.

54 Results: Built environment features extracted from GSV using deep learning predicted 63% of the census  
55 tract variation in CHD prevalence. The ExtraTrees Regressor achieved the best result among all models  
56 with the lowest average mean absolute error of 1.11% and Root mean square of error of 1.58. The  
57 addition of GSV features outperformed and improved a model that only included census-tract level age,  
58 sex, race, income and education. Activation maps from the features revealed a set of neighborhood  
59 features represented by buildings and roads associated with CHD prevalence.

60 Conclusions: In this cross-sectional study, a significant portion of CHD prevalence were explained by GSV-  
61 based built environment factors analyzed using deep learning, independent of census tract demographics.  
62 Machine vision enabled assessment of the built environment could help play a significant role in designing  
63 and improving heart-healthy cities.

## 64 **Introduction**

65 Coronary heart disease (CHD) accounts for over 50% of mortality from heart disease in the United States,  
66 responsible for nearly 400,000 deaths in 2020<sup>1</sup>. Despite advances in prevention and treatment over the  
67 past decade in the United States<sup>2</sup> CHD remains the leading cause of death in the United States since 1950  
68 with increasing evidence for non-conventional risk factors playing a large than anticipated role than  
69 previously suspected<sup>1,3</sup>.

70  
71 Socioenvironmental factors are amongst the leading non-traditional risk factors increasingly implicated in  
72 CHD development<sup>4-6</sup>. These factors include social determinants such as race, income, education, and  
73 culture as well as the factors in the built environment and factors in the ambient environment such as  
74 noise, and air pollution all of which have been to exert significant effects on CHD.<sup>5-8</sup>

75  
76 Large-scale integrated assessment of the environment at the neighborhood can facilitate rapid and  
77 complete assessment of its impact on CHD. Such data is however scarce, partly because of the costly and  
78 time-consuming nature of neighborhood audits, and inconsistent measurements and standards for data  
79 collection. Machine vision approaches such as Google Street View (GSV) has become an increasingly  
80 popular approach for virtual neighborhood audits since its launch in 2007. GSV image coverage has been  
81 consistently expanding in recent years achieving almost full coverage in the United States<sup>9</sup>. Previous  
82 studies have shown GSV results are comparable to field assessments and have been used to assess the  
83 built environment features such as greenspace<sup>10,11</sup>, buildings<sup>12</sup>, and roads<sup>13</sup>.

84  
85 GSV images further become a favored data source for large-scale studies due to the open availability of  
86 such data, arguably the largest compendium of machine vision enabled assessment of large tracts of the  
87 earth, and the standardized approaches used. Deep learning approaches such as convolutional neural  
88 networks (CNN) have been widely used in many studies and applications, given their excellent  
89 performance in tasks such as image classification, object detection, and image segmentation<sup>14</sup>. The use of  
90 such approaches to rapidly assess and extract built environment features from GSV images using deep  
91 learning can help facilitate integrated assessment and capture other aspects that may not be otherwise  
92 included. The goal of this study is to use GSV images to assess built environment and use them to estimate  
93 CHD prevalence at the census tract level.

## 94 95 **Methods**

### 96 **Data source for coronary heart disease**

97 The prevalence of census-tract coronary heart disease (CHD) was obtained from the CDC PLACES, a project  
98 that provided chronic disease risk factors, health outcomes, and clinical preventive services. This project,  
99 is a collaboration between the Centers for Disease Control and Prevention (CDC), the Robert Wood  
100 Johnson Foundation, and the CDC Foundation, measures CHD prevalence using data from Behavioral Risk  
101 Factor Surveillance System (BRFSS), where people aged  $\geq 18$  are surveyed to report whether or not they  
102 have been told by a doctor, nurse, or other health professional that they had angina or coronary heart  
103 disease. We collected the CHD prevalence data for 789 census tracts in 7 cities: Bellevue, WA; Brownsville,  
104 TX; Cleveland, OH; Denver, CO; Detroit, MI; Fremont, CA; and Kansas City, KS.

### 105 106 **Google street view data**

107 Environment information was derived from approximately 0.53 million GSV images for the 7 cities (143K  
108 for Detroit, 59K for Kansas City, 70K for Cleveland, 65K for Brownsville, 38K for Fremont, 35K for Bellevue,  
109 and 120K for Denver). The GSV images were downloaded via Google Street View Static Application  
110 Programming Interface (API) from 2020-2021. GSV API provides users with street-level panoramic  
111 imagery which captures the visual domain of pedestrians in thousands of cities worldwide. The GSV

112 images of each census tract were downloaded in a grid pattern in the corresponding tract with an interval  
113 of 100m. At each location where GSV images were retrieved, four images were gathered from different  
114 directions (i.e., the cardinal directions: N, E, S, and W.), which composes a panoramic view of the  
115 surroundings at that location. When latitude and longitude coordinates are provided, the API searches  
116 within a 50-meter radius for a photograph closest to this location. The API would not return any images  
117 if no available images could be found.

118  
119 To process these images and gain environment information from them, a pre-trained deep convolutional  
120 neural network (DCNN) Place365 CNN<sup>15</sup> was used as the feature extractor to obtain the deep features of  
121 the image. Here, the deep features are the outputs of the deep layers in the hierarchy of the network.  
122 Compared with the shallow features in the shallow layers, these deep features represent the semantic  
123 information of the GSV images. Details of how the extraction was performed can be found in e Figure 1 in  
124 the Supplement. We used Place365 CNN as the feature extractor because the images trained on Place365  
125 CNN are more similar to that of GSV. Place365 CNN was trained on the subset of Places Database, which  
126 contains more than 10 million images consisting of 400+ unique scene categories such as towers, soccer  
127 fields, streets, swimming pools, and train station platforms. Compared with the ImageNet database, the  
128 diversity of environmental features found in the Places Database was believed to be representative of  
129 what is contained in GSV images. Through feature extraction, we obtained 4096 features representing the  
130 average built environment information for each census tract.

### 131 132 **Statistical Analysis**

#### 133 **Features Visualization using Grad-CAM**

134 Elastic net regression models<sup>16</sup> were used to estimate the census tract-level CHD prevalence by using the  
135 DCNN-extracted features from GSV images. There are 4096 features and elastic net can handle this high  
136 dimensional data by applying L1 and L2 regularization. Ten-fold cross-validation was repeated 3 times to  
137 find the best parameters of the elastic net. Elastic net can select important features by simultaneously  
138 performing feature selection and feature shrinkage, so we used it to select top features according to the  
139 coefficients of each feature. The top features can be evaluated by examining the magnitudes and signs of  
140 their coefficients in the elastic net mode, thus understanding how each feature is associated with CHD  
141 prevalence. The top features were then visualized as the saliency map in the original GSV images using  
142 Grad-CAM technique<sup>17</sup>, which provides certain explanations of what environmental features the CNN  
143 thinks to be associated with neighborhood CHD prevalence.

#### 144 145 **Machine Learning Models with CNN-extracted Features**

146 A variety of machine-learning predictive models were used and compared to explore the association  
147 between the CNN-extracted features of GSV images and the tract-level CHD prevalence. The models for  
148 this analysis included ExtraTrees regressor (ET), AdaBoost regressor (AB), Random Forest Regressor (RF),  
149 Gradient Boosting Regressor (GB), Extreme Gradient Boosting Regressor (XGB), and Light Gradient  
150 Boosted Machine Regressor (LGBM). All models were estimated using a 10-fold cross-validation technique  
151 for a more robust result. For 10-fold cross-validation, the dataset is split into 10 equal-sized subsets, and  
152 the model is trained on 9 subsets and tested on the remaining 1 subset. This process is repeated 10 times  
153 until all 10 subsets were used once as the testing set. R-squared values were reported as the measure of  
154 association between the CNN-extracted features of GSV images and the tract-level CHD prevalence. The  
155 performance of each model was also evaluated using the mean absolute error (MAE) and root mean  
156 squared error (RMSE).

#### 157 158 **Multilevel Modeling with Demographics and Socio-Economic Factors**

159 We analyzed the effects of common demographic and socio-economic factors (DSE) as well as CNN-  
160 extracted features of GSV images (GSV) associated with the CHD. We built multilevel regression models  
161 to account for the effect of these factors including city, age, sex, race, income and education. A  
162 multivariate Sparse Partial Least Squares (SPLS) regression<sup>18</sup> was applied first to the CNN-extracted  
163 features to reduce the dimensionality issue and the effect of noise. The selected SPLS components and  
164 the demographic and socio-economic factors were then used to fit a Linear Mixed-Effect regression model.  
165 Three models were compared in this analysis: 1) a model containing both DSE factors and SPLS  
166 components (Combined Model); 2) a model with DSE factors alone (DSE Model); 3) a model with the SPLS  
167 components alone (GSV Model). Model performance was assessed using goodness of fits measures such  
168 as Likelihood Ratios Tests (as it applied), AIC and BIC criteria. In addition, all models were compared by  
169 using R squared values obtained from a Light Gradient Boosted Machine (LGBM) and Random Forest (RF)  
170 predictive model, which represent the amount of variance explained by each set of independent variables.  
171 The comparison was done using a 10-fold cross validation scheme.

172

## 173 **Results**

### 174 **Regression results with CNN Features**

175 The 4096 CNN-extracted features from GSV images were able to explain more than 63% of the variance  
176 ( $R^2 = 0.634$ ) on the tract-level CHD prevalence in 7 cities (Figure 1). The ET achieved the best result among  
177 all models with the lowest average MAE of 1.11 and RMSE of 1.58. The actual estimate from CDC's CHD  
178 prevalence and the model-predicted CHD prevalence were mapped for all census tracts in 7 cities (Figure  
179 2). There was a good agreement between the actual estimates and predicted CHD prevalence across all  
180 census tracts in 7 cities. We found a small number of extreme values that were underestimated by the  
181 models in certain census tracts of Detroit and Cleveland. The CHD prevalence of these underestimated  
182 census tracts was often more than 12%. When examining the CNN-extracted features using t-SNE, we  
183 noticed clustering of census tracts with similar values of CHD prevalence (eFigure2 in the supplement)

184

185

### 186 **Visualization of Top CNN Features**

187 Grad-CAM was utilized to visualize top CNN-extracted features identified from the elastic net model. The  
188 saliency maps generated by the Grad-CAM, suggested that feature #1555, which seemed to highlight  
189 deteriorated buildings (suggesting neighborhood blight), had a positive association with CHD prevalence  
190 (Figure 3a). Another feature (feature #484) that was positively associated with CHD was found to be  
191 highlighting road cracks as shown in Figure 3b. In contrast, feature #204 in Figure 3c had a negative  
192 association with CHD prevalence, and its heatmap highlighted trees along the road. Feature #1732,  
193 seeming to focus on well built houses, also had a negative association with CHD prevalence (Figure 3d).

194

195

### 196 **Comparison of CNN Features with Demographics and Socio-Economic Factors**

197 With SPLS, an optimal model was obtained with  $h = 7$  SPLS components ( $\eta = 0.6$ ), yielding a model with  
198 816 CNN-extracted features that explain  $R^2_{XY} > 66.7\%$  variance of CHD prevalence in the census tracts.  
199 All three models were compared with Table 1 shows model comparisons for all three models Likelihood  
200 Ratios Tests (LRT, also see eMethods in the Supplement). eTable 1 in the Supplement shows the  
201 corresponding regression estimates and ANOVA results. Table 2 and Supplemental eTable 2 show the  
202 amount of total explained variance of the GSV models and demographic and socioeconomic (DSE)  
203 variables (Table 2: LGBM, eTable 2: RF). After adjusting for each individual variable, we found that the  
204 combined model (GSV + DSE) demonstrated a better Goodness of Fit, with statistically significant higher  
205 log-likelihood and lower AIC/BIC when compared to GSV or DSE model alone (Table 1). Also, we found  
206 that nearly all the SPLS components are statistically significant (eTable 1 in the Supplement). Although the

207 DSE model has lower AIC and BIC values, with a significant LRT, when compared to the GSV model alone  
208 (Table 1), the GSV features alone explain more variance of CHD prevalence than the DSE variables (Table  
209 2). Altogether, this indicates that GSV features and traditional demographics and socio-economics  
210 variables are both significantly associated and predictive of CHD prevalence.

211

## 212 **Discussion**

213 While many epidemiological studies have examined associations between cardiovascular disease and  
214 individual built environmental features (e.g. greenspace, urban architecture, street connectivity, food  
215 availability), our approach focused on machine vision derived physical environment, relying on  
216 convolutional neural networks (CNN) and its related techniques to extract features.

217

218 Our results showed a good association ( $R^2 = 0.634$ ) between the CNN-extracted features from GSV and  
219 CHD at the census tract level in 7 cities. This indicated that the CNN-extracted features could capture  
220 neighborhood features impacting cardiovascular health. The predicted CHD prevalence using CNN-  
221 extracted features tended to underestimate in certain areas compared to observed CHD prevalence  
222 especially in Detroit and Cleveland. This may suggest that certain CHD-related factors may either not be  
223 embedded in these environments at these locations or that perhaps features not captured by street view  
224 images, such as demographic factors, ambient factors and other demographic and traditional variables  
225 may play a much larger role in these environments.

226

227 Our approach took the advantage of the knowledge that fully connected layers in the CNN contain  
228 condensed information of the input imagery that can be extracted and utilized for a variety of purposes.  
229 We utilized a pre-trained deep convolutional neural network (DCNN) Place365 CNN<sup>15</sup>, so that the deep  
230 features from the CNN may be more representative of the built environment. One advantage of this  
231 approach is that predefined relevant features in the built environment is not required. The 4096-  
232 dimensional deep features embeds all essential information of the built environment in the imagery so  
233 that we could retain relevant features as much as reasonably possible. Conversely, the disadvantage of  
234 using deep features from a pre-trained CNN is that it becomes difficult to identify corresponding physical  
235 features that impact CHD at the neighborhood level. To alleviate this issue and provide certain  
236 interpretations of the deep features, we utilized Grad-CAM techniques to visualize the CHD-related  
237 features with a saliency map.

238

239 Grad-CAM highlighted several potential built environment features that are either associated with higher  
240 or lower CHD at the neighborhood level. Deteriorated houses and roads are a feature of urban blight  
241 associated with higher CHD. This feature may in turn embody other features in the neighborhood that  
242 drive cardiovascular risk, including lack of space for physical activity<sup>7,19</sup>, limited access to nutritionally-  
243 balanced food<sup>20</sup>, lack of access to health care<sup>21</sup>. Street greenery on the other hand was highlighted as  
244 associated with lower CHD prevalence. This agrees with previous studies that showed a robust association  
245 between green space and decreased cardiovascular risks<sup>22,23</sup>.

246

247 The results of multilevel modeling using demographics and socio-economic factors, indicate that  
248 demographics and socio-economic variables, were still better predictors of CHD prevalence, than GSV  
249 features. One explanation is obviously the fact that physical environmental feature even if they represent  
250 a “meta” framework for other mediators, may not be sufficient to convey the risk conveyed by other  
251 factors which may be sparsely represented. Another reason may be that GSV features may engender  
252 increased model complexity, by virtue of including 4096 features (Table 1). However, GSV features alone  
253 could still explain preponderant proportion of variance in CHD prevalence (Table 2 and eTable1 in the  
254 Supplement). Therefore, by incorporating GSV features into regular DSE variables, one could help improve



255 the prediction of CHD prevalence at the neighborhood level. Our results further suggest that GSV features  
256 indeed may be helpful in highlighting specific built environment information related to CHD prevalence at  
257 the neighborhood level as illustrated by Grad-CAM methods, which provided a way of identifying built  
258 environment information.

259  
260 There are multiple limitations of this study that should be noted. Firstly, the GSV images used in the study  
261 are only available along major streets and roads, and there are some populations who do not live in such  
262 neighborhood. However, given the fact that most population live around the urban neighborhood where  
263 GSV are abundant, we believe this would not significantly affect the results for majority of census tracts.  
264 Further, although Place365 database contains 400+ unique scene categories, it may not include all  
265 features that can be found in the built environment. Small objects such as trash, other environmental  
266 pollutants and physical domains that may translate into better urban quality of life, may be difficult for  
267 computer vision techniques like CNN to detect in a GSV image<sup>24</sup>. Additionally, the census tracts with CHD  
268 prevalence data are from 7 representative U.S cities of CDC PLACES dataset, and may not generalize to all  
269 census tracts in the U.S., especially rural areas<sup>25</sup>. Future work is needed to examine the disparities of  
270 urban and rural areas and its cardiovascular-related built environment features.

271  
272 **Conclusion**  
273 Built environment impacts cardiovascular health outcome. In this study, we used Google Street View (GSV)  
274 and a scene-pretrained convolutional neural network (CNN) to assess the built environment. We found  
275 CNN-extracted features explain significant portion of coronary heart disease (CHD) prevalence at the  
276 census tract level. Compared to traditional demographic and socio-economic factors, GSV provides unique  
277 information that may relate to CHD such as buildings, greenspace and roads as suggested by the activation  
278 maps from Grad-CAM technique. The outcomes of our study provides proof of concept for machine-vision  
279 enabled identification of urban network features associated with risk that in principle, may enable rapid  
280 identification and targeting interventions in at-risk neighborhoods to reduce cardiovascular burden.

281  
282 **References**  
283 1. Tsao CW, Aday AW, Almarzooq ZI, et al. Heart Disease and Stroke Statistics—2022 Update: A Report  
284 From the American Heart Association. *Circulation*. 2022;145(8):e153-e639.  
285 doi:10.1161/CIR.0000000000001052  
  
286 2. *Health, United States, Annual Perspective, 2020-2021*. National Center for Health Statistics (U.S.);  
287 2022. doi:10.15620/cdc:122044  
  
288 3. Heron M, Anderson RN. Changes in the Leading Cause of Death: Recent Patterns in Heart Disease and  
289 Cancer Mortality. *NCHS Data Brief*. 2016;(254):1-8.  
  
290 4. Havranek EP, Mujahid MS, Barr DA, et al. Social Determinants of Risk and Outcomes for  
291 Cardiovascular Disease. *Circulation*. 2015;132(9):873-898. doi:10.1161/CIR.0000000000000228  
  
292 5. Al-Kindi SG, Brook RD, Biswal S, Rajagopalan S. Environmental determinants of cardiovascular  
293 disease: lessons learned from air pollution. *Nature Reviews Cardiology*. 2020;17(10):656-672.  
294 doi:10.1038/s41569-020-0371-2  
  
295 6. Bhatnagar A. Environmental Determinants of Cardiovascular Disease. *Circulation Research*.  
296 2017;121(2):162-180. doi:10.1161/CIRCRESAHA.117.306458

- 297 7. Sallis JF, Floyd MF, Rodríguez DA, Saelens BE. Role of built environments in physical activity, obesity,  
298 and cardiovascular disease. *Circulation*. 2012;125(5):729-737.  
299 doi:10.1161/CIRCULATIONAHA.110.969022
- 300 8. Rajagopalan S, Landrigan PJ. Pollution and the Heart. *N Engl J Med*. 2021;385(20):1881-1892.  
301 doi:10.1056/NEJMra2030281
- 302 9. Google. How Street View works and where we will collect images next. Google Maps Street View.  
303 Accessed February 2, 2023. <https://www.google.com/streetview/how-it-works/>
- 304 10. Seiferling I, Naik N, Ratti C, Proulx R. Green streets – Quantifying and mapping urban trees with  
305 street-level imagery and computer vision. *Landscape and Urban Planning*. 2017;165:93-101.  
306 doi:10.1016/j.landurbplan.2017.05.010
- 307 11. Lu Y. Using Google Street View to investigate the association between street greenery and  
308 physical activity. *Landscape and Urban Planning*. 2019;191:103435.  
309 doi:10.1016/J.LANDURBPLAN.2018.08.029
- 310 12. Kang J, Körner M, Wang Y, Taubenböck H, Zhu XX. Building instance classification using street  
311 view images. *ISPRS Journal of Photogrammetry and Remote Sensing*. 2018;145:44-59.  
312 doi:10.1016/j.isprsjprs.2018.02.006
- 313 13. Nagata S, Nakaya T, Hanibuchi T, Amagasa S, Kikuchi H, Inoue S. Objective scoring of streetscape  
314 walkability related to leisure walking: Statistical modeling approach with semantic segmentation of  
315 Google Street View images. *Health & Place*. 2020;66:102428. doi:10.1016/j.healthplace.2020.102428
- 316 14. LeCun Y, Bengio Y, Hinton G. Deep learning. *Nature*. 2015;521(7553):436-444.  
317 doi:10.1038/nature14539
- 318 15. Zhou B, Lapedriza A, Khosla A, Oliva A, Torralba A. Places: A 10 Million Image Database for Scene  
319 Recognition. *IEEE Transactions on Pattern Analysis and Machine Intelligence*. 2018;40(6):1452-1464.  
320 doi:10.1109/TPAMI.2017.2723009
- 321 16. Zou H, Hastie T. Regularization and variable selection via the elastic net. *Journal of the Royal  
322 Statistical Society Series B: Statistical Methodology*. 2005;67(2):301-320. doi:10.1111/j.1467-  
323 9868.2005.00503.x
- 324 17. Selvaraju RR, Cogswell M, Das A, Vedantam R, Parikh D, Batra D. Grad-CAM: Visual Explanations  
325 from Deep Networks via Gradient-Based Localization. *Proceedings of the IEEE international  
326 conference on computer vision*. Published online 2017:618-626. doi:10.1007/s11263-019-01228-7
- 327 18. Chun H, Keleş S. Sparse partial least squares regression for simultaneous dimension reduction  
328 and variable selection. *J R Stat Soc Series B Stat Methodol*. 2010;72(1):3-25. doi:10.1111/j.1467-  
329 9868.2009.00723.x
- 330 19. Chandrabose M, Rachele JN, Gunn L, et al. Built environment and cardio-metabolic health:  
331 systematic review and meta-analysis of longitudinal studies. *Obesity Reviews*. 2019;20(1):41-54.  
332 doi:10.1111/obr.12759



- 333 20. Gondi KT, Larson J, Sifuentes A, et al. Health of the Food Environment Is Associated With Heart  
334 Failure Mortality in the United States. *Circulation: Heart Failure*. 2022;15(12):e009651.  
335 doi:10.1161/CIRCHEARTFAILURE.122.009651
- 336 21. White-Williams C, Rossi LP, Bittner VA, et al. Addressing Social Determinants of Health in the  
337 Care of Patients With Heart Failure: A Scientific Statement From the American Heart Association.  
338 *Circulation*. 2020;141(22):e841-e863. doi:10.1161/CIR.0000000000000767
- 339 22. Pereira G, Foster S, Martin K, et al. The association between neighborhood greenness and  
340 cardiovascular disease: an observational study. *BMC Public Health*. 2012;12:466. doi:10.1186/1471-  
341 2458-12-466
- 342 23. Mitchell R, Popham F. Effect of exposure to natural environment on health inequalities: an  
343 observational population study. *Lancet*. 2008;372(9650):1655-1660. doi:10.1016/S0140-  
344 6736(08)61689-X
- 345 24. Ross CE, Mirowsky J. Disorder and Decay: The Concept and Measurement of Perceived  
346 Neighborhood Disorder. *Urban Affairs Review*. 1999;34(3):412-432.  
347 doi:10.1177/107808749903400304
- 348 25. Loccoh EC, Joynt MKE, Wang Y, Kazi DS, Yeh RW, Wadhera RK. Rural-Urban Disparities in  
349 Outcomes of Myocardial Infarction, Heart Failure, and Stroke in the United States. *Journal of the*  
350 *American College of Cardiology*. 2022;79(3):267-279. doi:10.1016/j.jacc.2021.10.045

351  
352

353 **Figures**

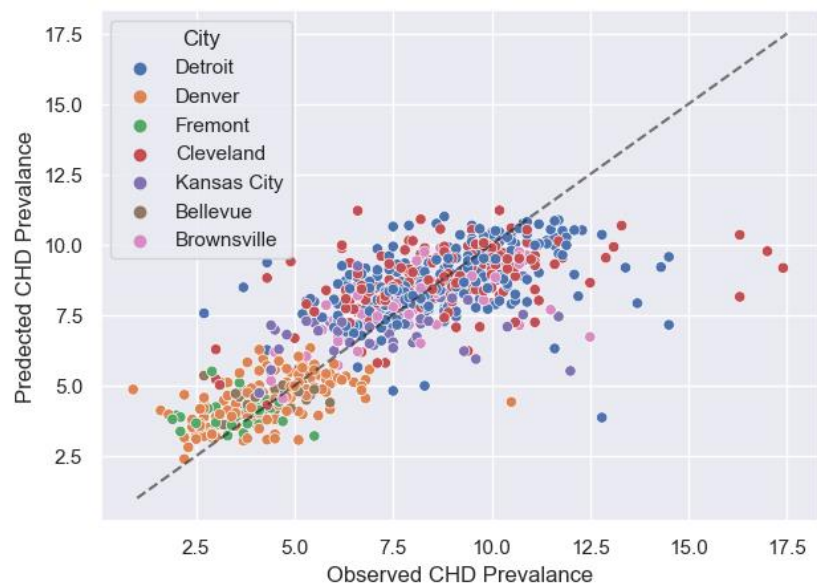

354  
355 Figure 1. Scatterplot of the actual estimated (observed) and predicted CHD prevalence (in percentage) in  
356 seven cities. The Black dotted line represents the  $y = x$  line.  
357

358  
359

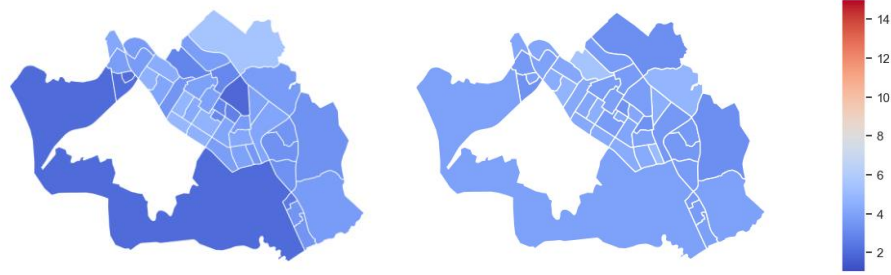

Fremont, CA

360  
361

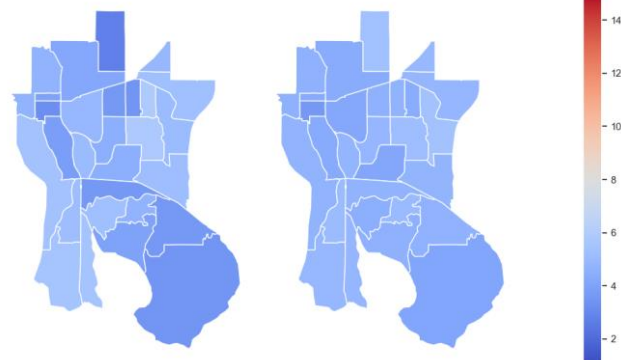

Bellevue, WA

362  
363

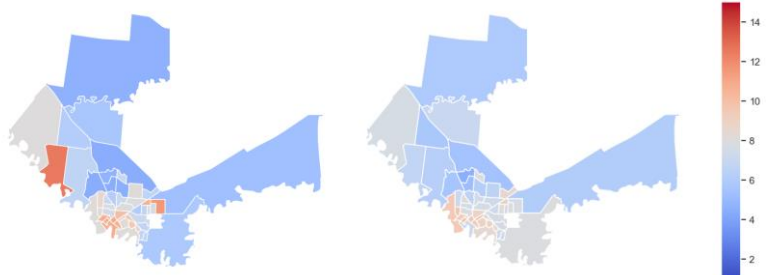

Brownsville, TX

364  
365

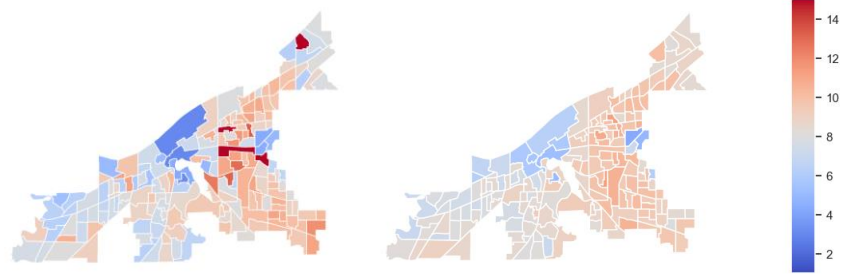

Cleveland, OH

366  
367

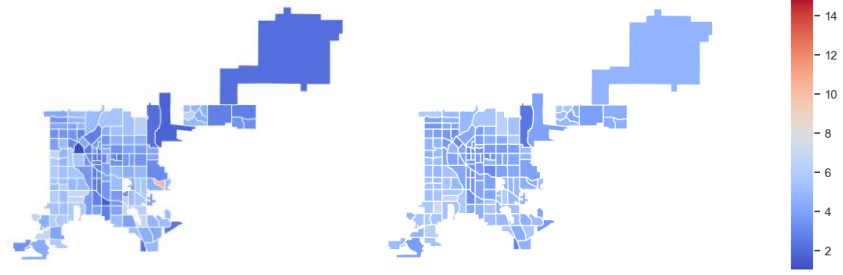

Denver, CO

368  
369

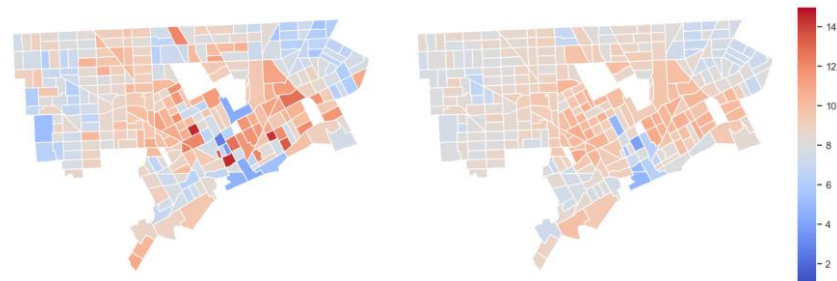

Detroit, MI

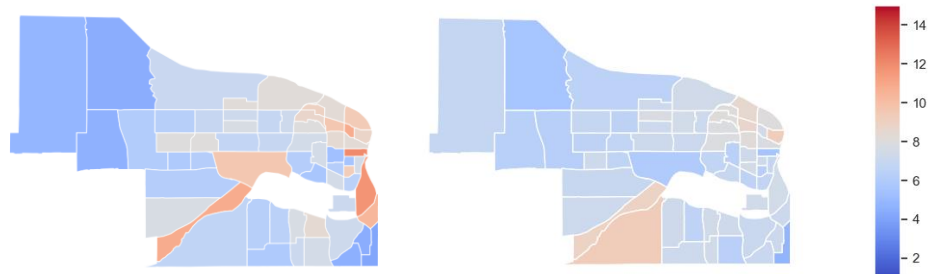

Kansas City, KS

370  
371  
372  
373  
374  
375

Figure 2. Maps of the actual estimates of cardiovascular heart disease (CHD) prevalence (left) and predicted CHD prevalence (right, in percentage). The predicted CHD prevalence is obtained by averaging the results from 100 random trials based on  $k$ -fold cross-validation (with  $k = 10$ ).



376

### GSV associated with higher CHD

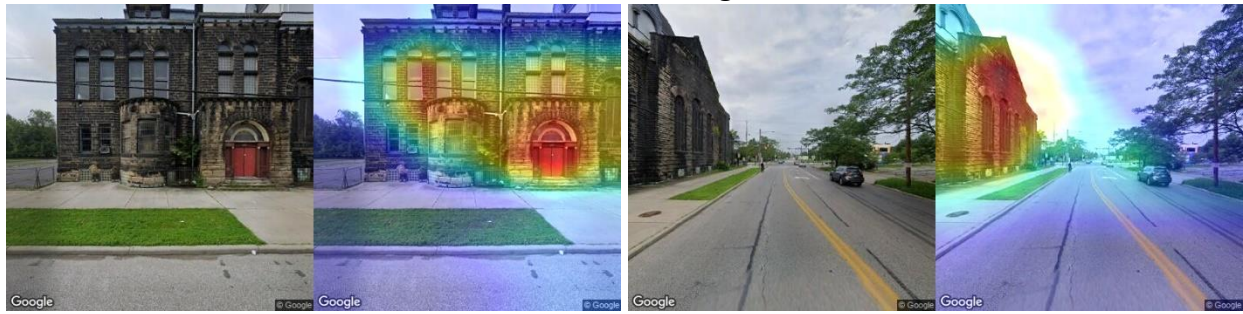

377

378

(a) Feature #1555

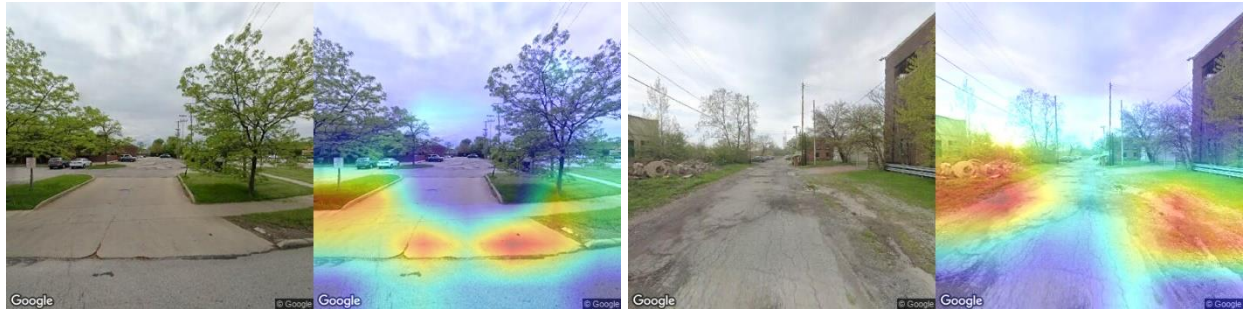

379

380

381

382

(b) Feature #484

### GSV associated with lower CHD

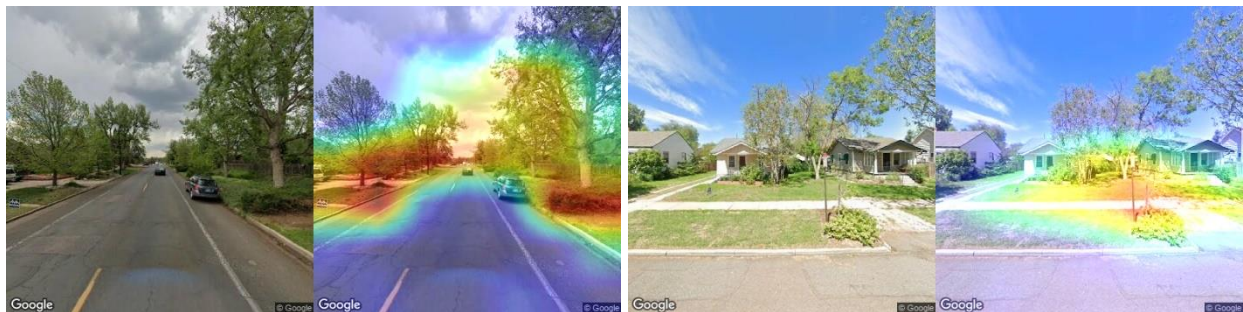

383

384

(c) Feature #204

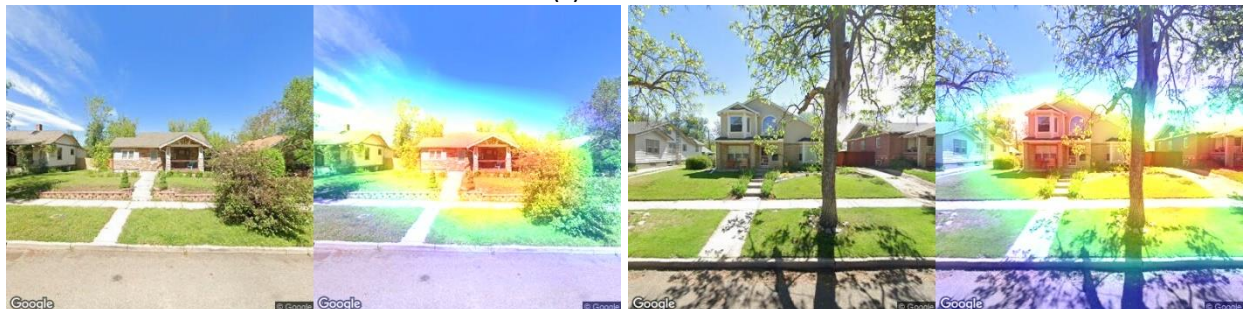

385

386

(d) Feature #1732

387 Figure 3. Feature interpretations using Grad-CAMs. Images (a) and (b) show the two pairs of GSV  
388 images (left) and their activation maps (right) for the features associated with higher CHD prevalence.  
389 Images (c) and (d) show the two pairs of GSV images (left) and their activation maps (right) for the  
390 features associated with lower CHD prevalence.

391

392 **Tables**

393  
394 Table 1. AIC, BIC Criteria and Likelihood Ratios Tests (LRT) of LMM models by Model Combination for  
395 CHD Prevalence. Models: GSV = the reduced LMM model with only the selected SPLS components CHD:  
396  $h = 7$  obtained from the full CNN features; DSE = the reduced LMM model with only the Demographics  
397 and Socio-Economic variables; Combined = the full LMM model with both sets of independent variables  
398 from GSV and DSE.

---

---

| <b>CHD</b> |       |        |           |                  |       |           |
|------------|-------|--------|-----------|------------------|-------|-----------|
| LMM Model  | AIC   | BIC    | Log. Lik. | Test             | LRT   | p-value   |
| Combined   | 757.0 | 835.0  | -368.0    |                  |       |           |
| DSE        | 930.0 | 967.0  | -457.0    | Combined vs. DSE | 178.0 | < 1.00E-4 |
| Combined   | 757.0 | 835.0  | -368.0    |                  |       |           |
| GSV        | 984.0 | 1029.0 | -482.0    | Combined vs. GSV | 227.0 | < 1.00E-4 |
| DSE        | 930.0 | 967.0  | -457.0    |                  |       |           |
| GSV        | 984.0 | 1029.0 | -482.0    | DSE vs. GSV      | 49.0  | < 1.00E-4 |

---

---

399

400



401 Table 2. Total Explained Variance of the LGBM Prediction Model by Model Combination for CHD  
402 Prevalence.

| LGBM Model | R <sup>2</sup> |       |            |
|------------|----------------|-------|------------|
|            | Median         | Mean  | Std. Error |
| DSE        | 0.360          | 0.149 | 0.553      |
| GSV        | 0.591          | 0.597 | 0.057      |

403

## 404 **SUPPLEMENTARY MATERIAL**

405

### 406 **Supplementary Information Text**

#### 407 **Multilevel Modeling of Demographics and Socio-Economic Effects**

408 Population Demographics and Socio-Economic status variables are well-known factors associated with  
409 the prevalence of disease such as those of interest in this study. To assess the contribution of these  
410 effects besides the CNN-extracted features to the crude prevalence of CHD a multilevel-level regression  
411 model was built to simultaneously account for the effect of City, as well as variables Age (Median), Sex  
412 (Female %), Race (White %), Income (Median \$), and Education (< High School %) in addition to the 4096  
413 CNN-extracted features. Further, to reduce the dimensionality of the problem and to reduce the effect  
414 of noise on the error rates of our inferences, we followed a two-step modeling strategy. In the first step,  
415 a multivariate Sparse Partial Least Squares (SPLS) regression<sup>27</sup> was applied to the CNN-extracted  
416 features to consider a reduced set of selected SPLS components (latent variables/factors), to which  
417 dimension reduction was further applied by imposing sparsity on their loadings (CNN-extracted  
418 features). This was done by using shrinkage estimates of regression coefficients (loadings of component)  
419 with combined L1- and L2-penalized estimation. The two tuning parameters of the multivariate Sparse  
420 PLS regression model are: (i) the number  $h \in \left[1, \min\left(p, \left(\frac{f-1}{f}\right)n\right)\right]$  of components that enter the Linear  
421 Mixed Effects Model (where  $f$  is the number of folds and  $p$  is the dimensionality and  $n$  is the sample  
422 size), and (ii) the sparsity parameter that controls the amount of shrinkage by a combination of the L1-  
423 and L2-penalties. Both were tuned simultaneously by 10-fold Cross-Validation. In the second step, a  
424 Mixed-Effect regression model was fitted with the first few selected SPLS components augmented with  
425 the other Demographics and Socio-Economic variables, all treated here as fixed-effects, and where City  
426 was treated as a random effect. Departure from normality of the univariate dependent variable (CHD  
427 Prevalence) was tested by EDA analysis and Shapiro-Wilks test. A Box-Cox transformation of the  
428 response was applied to minimize departure from normality. Because the dependent variables are  
429 continuous, modeling was done by fitting a Linear Mixed Effects Model (LMM). The modeling is entirely  
430 supervised because multivariate SPLS regression seeks latent components that not only capture the  
431 most variance in the  $X$ -space (multivariate independent variables) but also the most covariance with the  
432 response  $Y$  (univariate dependent variable of disease prevalence). Finally, AIC and BIC criteria as well as  
433 Likelihood Ratios Tests (as it applied) were used for model comparison between the full model and the  
434 reduced models with the Demographics and Socio-Economic variables alone or the selected SPLS  
435 components alone. Goodness of fit results of all models were also compared by the  $R^2$  amount of  
436 explained variance achieved by each set of independent variables in the cross validated Random Forest  
437 (RF) and Light Gradient Boosted Machine (LGBM) predictive models as described above.

#### 438 **Comparison of CNN Features with Recognized Factors**

439 An optimal model could be obtained after model parameter tuning by cross-validation with a maximum  
440 of  $h = 7$  SPLS components and  $\eta = 0.6$ , yielding a final model comprising  $s = 2031$  selected loadings or  
441 CNN-extracted features. This resulted in a SPLS model with a cumulative explained variance of CHD:  
442  $R_{XY}^2 > 66.7\%$ . Additional selection of the CNN-extracted features was done by excluding loadings with

443 0-containing 95% bootstrapped confidence intervals, resulting in a final model of CHD:  $s = 816$  loadings.  
444 Model specification only included main random and fixed effects and no random interaction effect was  
445 found significant. Also, a structure for the covariance matrix was deemed not necessary (not statistically  
446 significantly different).

447 We further refer to the Google Satellite View (GSV) model, as the reduced LMM model where only the  
448 selected SPLS components (CHD:  $h = 7$ ) obtained from the full CNN features enter into the model.  
449 Likewise, we refer to the Demographics and Socio-Economic (DSE) model, as the reduced LMM model  
450 where only the Demographics and Socio-Economic variables enter into the model. We compared the  
451 regression estimates and Goodness of Fit (GOF) measures between these reduced models and the  
452 Combined LMM model, where both sets of independent variables enter simultaneously. For all three  
453 models, Table 1 shows model comparisons by GOF and Likelihood Ratios Tests (LRT), and Supplemental  
454 eTable 1 shows the corresponding regression estimates and ANOVA results. Likewise, Table 2 shows the  
455 amount of total explained variance by predictive modeling (Table 2: LGBM, Supplemental eTable2: RF).

456

457 **Supplementary Figures**

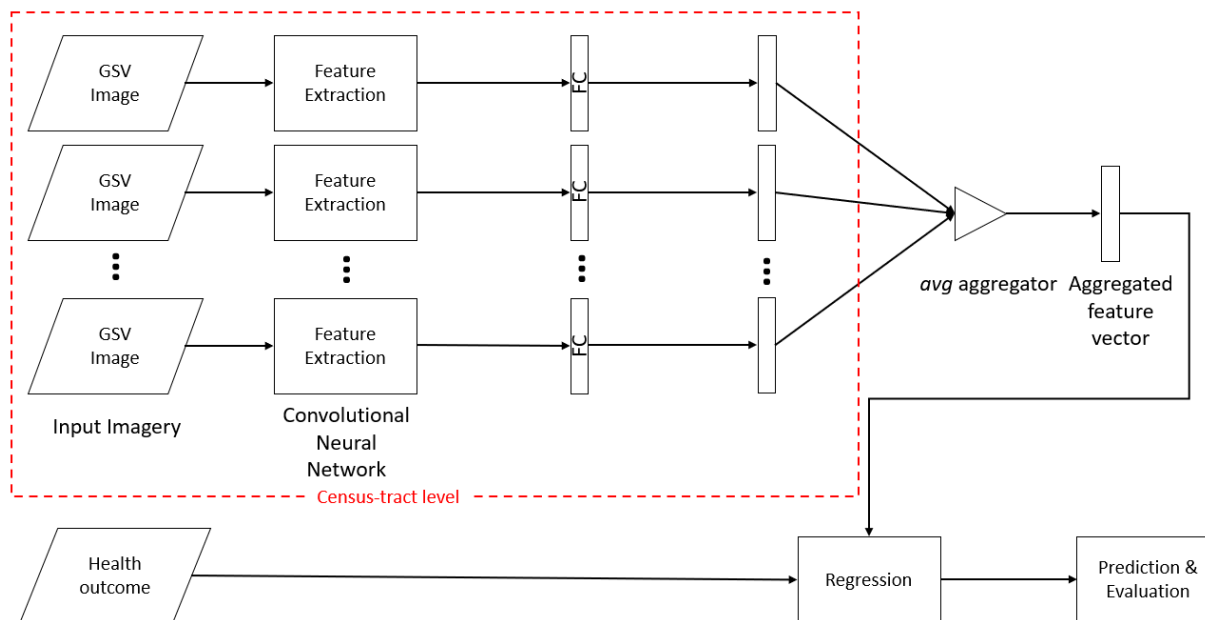

458

459 eFigure 1. Workflow of the GSV feature extract and regression method. A Places365 pre-trained  
460 convolutional neural network – ResNet-50 was used as a feature extractor to obtain the deep features  
461 from GSV images. The aggregated feature vector was used in regression to predict CHD prevalence.

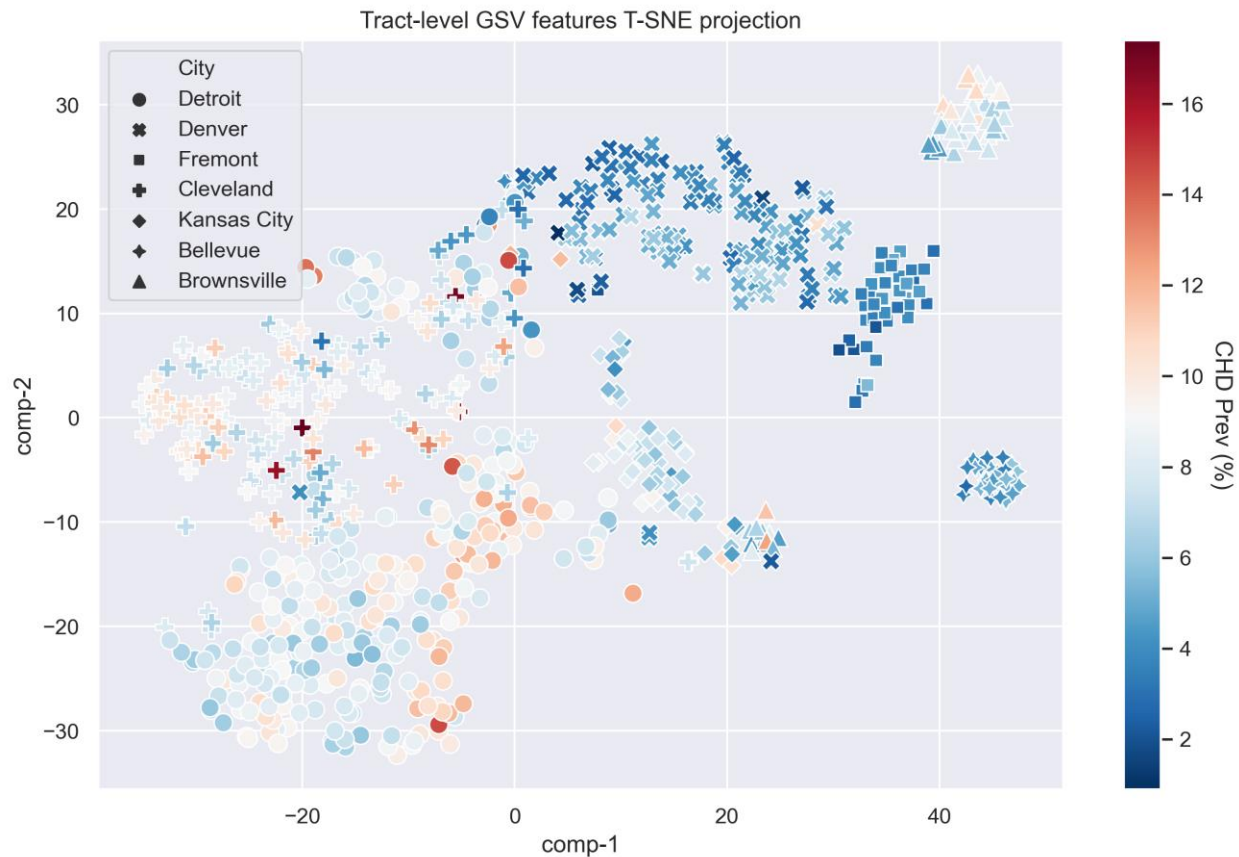

462

463 eFigure2. T-SNE projection of the 4096 features from GSV data for the tracts of 7 cities. The projected  
464 points are colored by CHD prevalence (%) of the census tract.

465

466 **Supplementary Tables**

467 eTable 1. Regression Estimates and ANOVA Results by Model Combination for CHD Prevalence.

| <b>CHD</b> |                |               |                   |                |                |                |                |
|------------|----------------|---------------|-------------------|----------------|----------------|----------------|----------------|
|            | <b>Effects</b> | <b>Coeff.</b> | <b>Std. Error</b> | <b>t-value</b> | <b>p-value</b> | <b>F-value</b> | <b>p-value</b> |
| Combined   | sex            | < 0.1         | < 0.1             | 2.870          | 0.004          | 3428           | < 0.0001       |
|            | Age            | < 0.1         | < 0.1             | 14.92          | < 0.001        | 150            | < 0.0001       |
|            | Race           | < 0.1         | < 0.1             | -3.450         | 0.001          | 94.000         | < 0.0001       |
|            | Income         | < 0.1         | < 0.1             | -10.36         | < 0.001        | 515            | < 0.0001       |
|            | Education      | 1.2           | 0.18              | 6.790          | < 0.001        | 132            | < 0.0001       |
|            | Comp.1         | 44.2          | 19.56             | 2.260          | 0.024          | 52.000         | < 0.0001       |
|            | Comp.2         | -23.2         | 11.02             | -2.11          | 0.035          | 6.000          | < 0.0181       |
|            | Comp.3         | 36.5          | 9.65              | 3.780          | < 0.001        | 59.000         | < 0.0001       |
|            | Comp.4         | 32            | 9.95              | 3.220          | 0.001          | 7.000          | 0.0109         |
|            | Comp.5         | -41.2         | 10.75             | -3.83          | < 0.001        | 1.000          | 0.4663         |
|            | Comp.6         | 35.7          | 10.25             | 3.480          | 0.001          | 10             | 0.0014         |
|            | Comp.7         | 49.5          | 10.67             | 4.640          | < 0.001        | 21             | < 0.0001       |
| DSE        | Sex            | 0.011         | 0.034             | 3.22           | 0.001          | 18             | < 0.0001       |
|            | Age            | 0.042         | 0.025             | 17.06          | < 0.001        | 142            | < 0.0001       |
|            | Race           | -0.006        | 0.001             | -6.37          | < 0.001        | 85             | < 0.0001       |
|            | Income         | 0             | 0                 | -10.42         | < 0.001        | 297            | < 0.0001       |
|            | Education      | 1.903         | 0.181             | 10.49          | < 0.001        | 110            | < 0.0001       |
| GSV        | Comp.1         | 61.8          | 26.19             | 2.36           | 0.019          | 115            | < 0.0001       |
|            | Comp.2         | -25.4         | 13.3              | -1.91          | 0.057          | 54             | < 0.0001       |
|            | Comp.3         | 58.7          | 11.64             | 5.04           | < 0.001        | 137            | < 0.0001       |
|            | Comp.4         | 73.9          | 12.96             | 5.7            | < 0.001        | 23             | < 0.0001       |
|            | Comp.5         | -51.9         | 14.09             | -3.69          | < 0.001        | 5              | 0.0248         |
|            | Comp.6         | 36.2          | 12.74             | 2.86           | 0.004          | 5              | 0.0258         |
|            | Comp.7         | 82.2          | 13.51             | 6.08           | < 0.001        | 37             | < 0.0001       |

468

469 eTable 2. Total Explained Variance of the RF Prediction Model by Model Combination for CHD  
470 Prevalence.

471

| <b>CHD</b> | <b>R<sup>2</sup></b> |             |                   |
|------------|----------------------|-------------|-------------------|
|            | <b>Median</b>        | <b>Mean</b> | <b>Std. Error</b> |
| DSE        | 0.328                | 0.160       | 0.559             |
| GSV        | 0.613                | 0.615       | 0.045             |

472
